# Supplementary material for: Examination of yield, bacteriolytic activity and cold storage of linker deletion mutants based on endolysin S6_ORF93 derived from Staphylococcus giant bacteriophage S6
Source: PubMed Central journal article supplement (PMC11498662; doi:10.1371/journal.pone.0310962), 2024-10-23
Supplement: pone.0310962.s001.pdf [file pone.0310962.s001.pdf]

A

|            |            |            |            |            |            |     |
|------------|------------|------------|------------|------------|------------|-----|
|            | 10         | 20         | 30         | 40         | 50         | 60  |
| MKTKTQALNW | VNNRIGRRLD | MDGAYGAQCM | DLTIGYCNLY | TDGKFWPWGN | AKDLKSNTMP |     |
|            | 70         | 80         | 90         | 100        | 110        | 120 |
| SGWKLIKNTF | SFLPQPGDIA | IWANPPYDVY | GHTGIITSAN | LNNFYSDQD  | WFNAGSNGSP |     |
|            | 130        | 140        | 150        | 160        | 170        | 180 |
| AAKVFHDYTG | FWGVIRPAFS | STATKKATTK | KAAPKKKVVK | KAAPKKAVTS | AKWKRNSAGI |     |
|            | 190        | 200        | 210        | 220        | 230        | 240 |
| LWKTEKATFK | CNVASGIITR | KNGPWTGWPT | GPFMKGDSI  | KYEEIQDFDG | LIWVSGKFKG |     |
|            | 250        | 260        | 270        | 280        | 290        | 300 |
| QYVYVPIGKS | NGKGQRIGNA | WGTFS      |            |            |            |     |

B

|            |            |            |            |            |            |     |
|------------|------------|------------|------------|------------|------------|-----|
|            | 10         | 20         | 30         | 40         | 50         | 60  |
| MKTKTQALNW | VNNRIGRRLD | MDGAYGAQCM | DLTIGYCNLY | TDGKFWPWGN | AKDLKSNTMP |     |
|            | 70         | 80         | 90         | 100        | 110        | 120 |
| SGWKLIKNTF | SFLPQPGDIA | IWANPPYDVY | GHTGIITSAN | LNNFYSDQD  | WFNAGSNGSP |     |
|            | 130        | 140        | 150        | 160        | 170        | 180 |
| AAKVFHDYTG | FWGVIRPAFS | STATKKATTK | KAVVKAAPK  | KAVTSAKWKR | NSAGILWKTE |     |
|            | 190        | 200        | 210        | 220        | 230        | 240 |
| KATFKCNVAS | GIITRKNGPW | TGWPTGPFMK | KGDSIKYEEI | QDFDGLIWVS | GKFKGQYVYV |     |
|            | 250        | 260        | 270        | 280        | 290        | 300 |
| PIGKSNGKGQ | RIGNAWGTFS |            |            |            |            |     |

C

|            |            |            |            |            |            |     |
|------------|------------|------------|------------|------------|------------|-----|
|            | 10         | 20         | 30         | 40         | 50         | 60  |
| MKTKTQALNW | VNNRIGRRLD | MDGAYGAQCM | DLTIGYCNLY | TDGKFWPWGN | AKDLKSNTMP |     |
|            | 70         | 80         | 90         | 100        | 110        | 120 |
| SGWKLIKNTF | SFLPQPGDIA | IWANPPYDVY | GHTGIITSAN | LNNFYSDQD  | WFNAGSNGSP |     |
|            | 130        | 140        | 150        | 160        | 170        | 180 |
| AAKVFHDYTG | FWGVIRPAFS | STATKKAVVK | KAAPKKAVTS | AKWKRNSAGI | LWKTEKATFK |     |
|            | 190        | 200        | 210        | 220        | 230        | 240 |
| CNVASGIITR | KNGPWTGWPT | GPFMKGDSI  | KYEEIQDFDG | LIWVSGKFKG | QYVYVPIGKS |     |
|            | 250        | 260        | 270        | 280        | 290        | 300 |
| NGKGQRIGNA | WGTFS      |            |            |            |            |     |

D

|            |            |            |            |            |            |     |
|------------|------------|------------|------------|------------|------------|-----|
|            | 10         | 20         | 30         | 40         | 50         | 60  |
| MKTKTQALNW | VNNRIGRRLD | MDGAYGAQCM | DLTIGYCNLY | TDGKFWPWGN | AKDLKSNTMP |     |
|            | 70         | 80         | 90         | 100        | 110        | 120 |
| SGWKLIKNTF | SFLPQPGDIA | IWANPPYDVY | GHTGIITSAN | LNNFYSDQD  | WFNAGSNGSP |     |
|            | 130        | 140        | 150        | 160        | 170        | 180 |
| AAKVFHDYTG | FWGVIRPAFS | STVVKKAAPK | KAVTSAKWKR | NSAGILWKTE | KATFKCNVAS |     |
|            | 190        | 200        | 210        | 220        | 230        | 240 |
| GIITRKNGPW | TGWPTGPFMK | KGDSIKYEEI | QDFDGLIWVS | GKFKGQYVYV | PIGKSNGKGQ |     |
|            | 250        | 260        | 270        | 280        | 290        | 300 |
| RIGNAWGTFS |            |            |            |            |            |     |

E

|            |            |            |            |            |            |     |
|------------|------------|------------|------------|------------|------------|-----|
|            | 10         | 20         | 30         | 40         | 50         | 60  |
| MKTKTQALNW | VNNRIGRRLD | MDGAYGAQCM | DLTIGYCNLY | TDGKFWPWGN | AKDLKSNTMP |     |
|            | 70         | 80         | 90         | 100        | 110        | 120 |
| SGWKLIKNTF | SFLPQPGDIA | IWANPPYDVY | GHTGIITSAN | LNNFYSDQD  | WFNAGSNGSP |     |
|            | 130        | 140        | 150        | 160        | 170        | 180 |
| AAKVFHDYTG | FWGVIRPVVK | KAAPKKAVTS | AKWKRNSAGI | LWKTEKATFK | CNVASGIITR |     |
|            | 190        | 200        | 210        | 220        | 230        | 240 |
| KNGPWTGWPT | GPFMKGDSI  | KYEEIQDFDG | LIWVSGKFKG | QYVYVPIGKS | NGKGQRIGNA |     |
|            | 250        | 260        | 270        | 280        | 290        | 300 |
| WGTFS      |            |            |            |            |            |     |
