# Supplementary material for: Examination of yield, bacteriolytic activity and cold storage of linker deletion mutants based on endolysin S6_ORF93 derived from Staphylococcus giant bacteriophage S6
Source: PubMed Central journal article supplement (PMC11498662; doi:10.1371/journal.pone.0310962), 2024-10-23

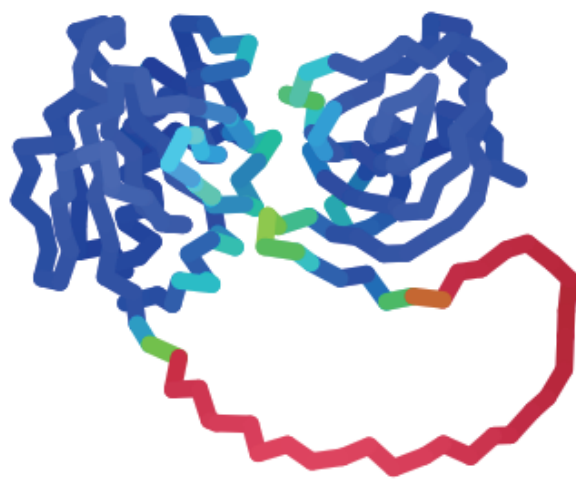

Supplement: pone.0310962.s002.pdf [file pone.0310962.s002.pdf]
