# Supplementary material for: Examination of yield, bacteriolytic activity and cold storage of linker deletion mutants based on endolysin S6_ORF93 derived from Staphylococcus giant bacteriophage S6
Source: PubMed Central journal article supplement (PMC11498662; doi:10.1371/journal.pone.0310962), 2024-10-23

$$\Delta OD_{595} / \text{min/mg} = \frac{\Delta OD_{595} (\text{control}_{30\text{min}} - \text{sample}_{30\text{min}})}{30 (\text{min}) / \text{sample (mg)}}$$

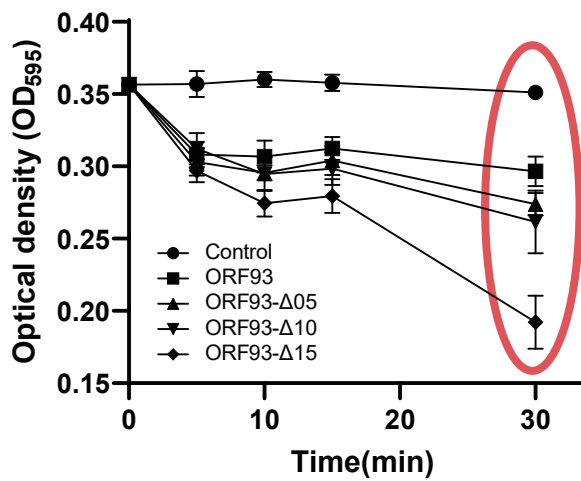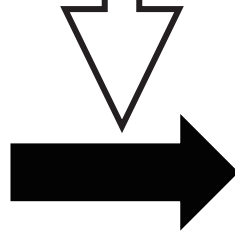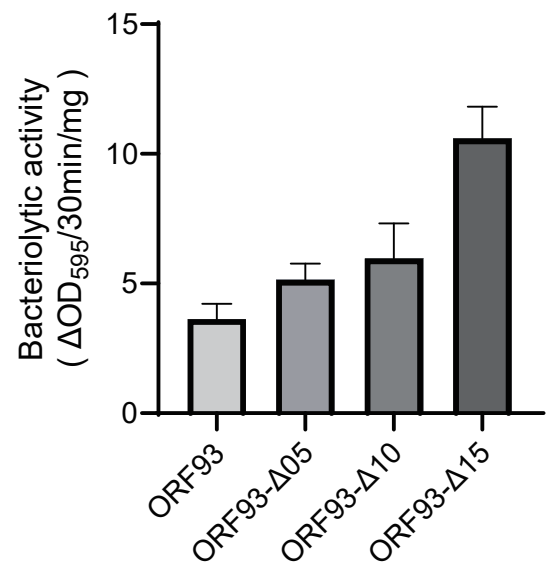

Supplement: pone.0310962.s005.pdf [file pone.0310962.s005.pdf]
