# Supplementary material for: Examination of yield, bacteriolytic activity and cold storage of linker deletion mutants based on endolysin S6_ORF93 derived from Staphylococcus giant bacteriophage S6
Source: PubMed Central journal article supplement (PMC11498662; doi:10.1371/journal.pone.0310962), 2024-10-23
Supplement: pone.0310962.s006.pdf [file pone.0310962.s006.pdf]

The 15 bp sequence complement  
to the linearized pUC19 vector

|            |            |            |            |            |            |
|------------|------------|------------|------------|------------|------------|
| CGGTACCCGG | GGATCGAGCT | CAAGACCAA  | ACACAAGCTC | TTAACTGGGT | GAATAACCGT |
| ATTGGCCGGC | GTTTGGATAT | GGATGGTGCC | TACGGTGCCC | AATGTATGGA | TCTCACGATC |
| GGCTACTGCA | ATTATCTTAC | GGACGGGAAG | TTCTGGCCTT | GGGGTAATGC | TAAGGATCTC |
| AAATCCAATA | CTATGCCGAG | TGGGTGGAAA | TTGATTAAAA | ACACGCCGTC | GTTTTTGCCA |
| CAGCCGGGTG | ACATTGCCAT | CTGGGCCAAT | CCTCCATACG | ACGTGTATGG | GCATACAGGG |
| ATTATTACTT | CCGCCAACCT | GAACAATTTT | TATAGTATTG | ACCAAAATTG | GTTTAATGCG |
| GGTTCTAACG | GGAGTCCTGC | TGCCAAGGTA | TTCCACGACT | ACACCGGTTT | CTGGGGTGTC |
| ATTCGGCCTG | CGTTTTCGAG | CACAGCGACC | AAAAAAGCTA | CTACCAAGAA | GGCTGCCCCA |
| AAGAAGAAAG | TTGTCAAAAA | GGCTGCACCG | AAGAAGGCTG | TAACATCAGC | TAAGTGAAA  |
| CGTAATAGTG | CTGGGATTCT | GTGGAAGACG | GAGAAGGCGA | CCTTCAAGTG | TAATGTTGCG |
| TCTGGTATTA | TTACGCGTAA | GAATGGTCCG | TGGACGGGTT | GGCCTACAGG | CCCGTTCATG |
| AAAAAGGGCG | ATTCGATTAA | GTACGAAGAA | ATTCAGGATT | TTGACGGCCT | TATTTGGGTT |
| TCTGGGAAAT | TTAAAGGTCA | ATACGTGTAC | GTTCCGATCG | GGAAATCCAA | TGGGAAGGGC |
| CAACGGATTG | GCAACGCCTG | GGTACTTTT  | AGCTCTAGAG | ATCCTCTAGA | GTCG       |

Sac I

Xba I

The 15 bp sequence complement  
to the linearized pUC19 vector
